# Supplementary material
Source: publisher site journal article supplement (https://www.spandidos-publications.com/2929/downloadSupplementary)

Figure S1. TaqMan genotyping array. Representative allelic discrimination plot of the rs799917 single nucleotide polymorphism in patients with lung cancer. The axes units indicate the fluorescence signals. The red color indicates T/T, while the blue indicates C/C and the green indicates the C/T genotypes. The black X represents undetermined samples. The black square represents a sample that could not be analyzed.

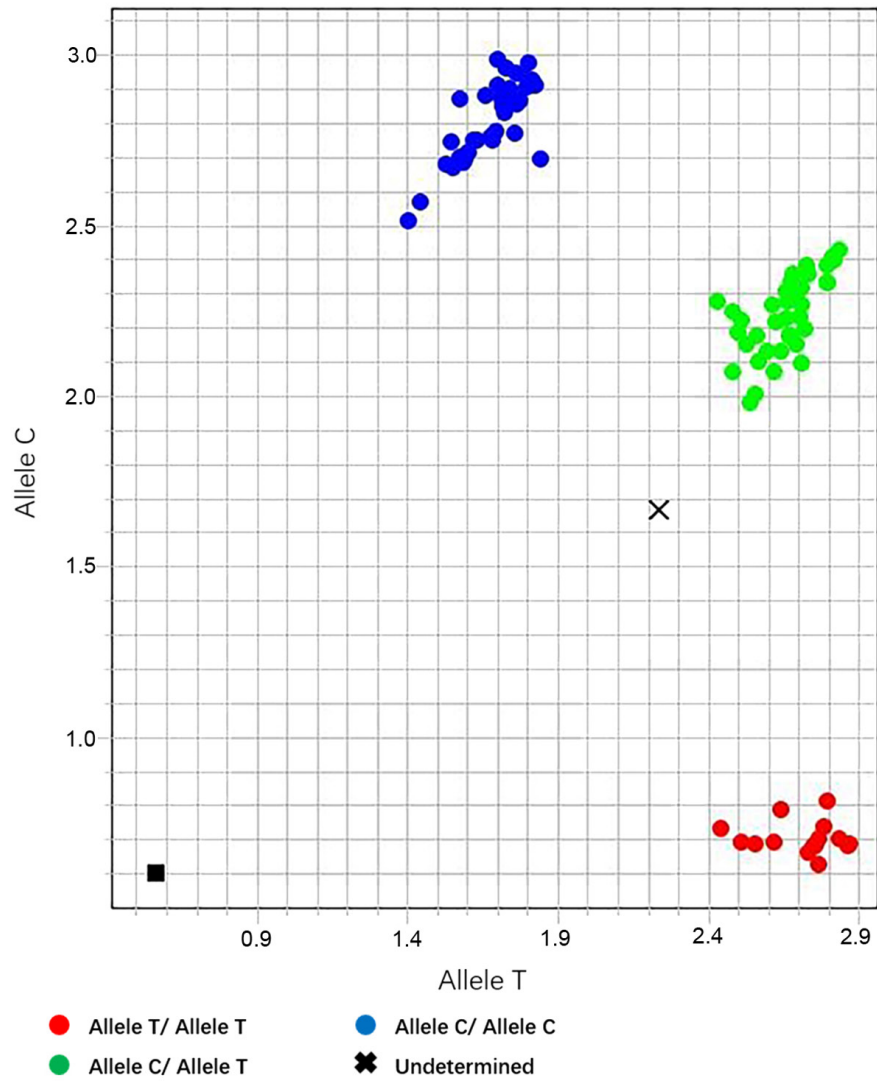

Supplement: Supplementary file 1 [file downloadSupplementary]
